# Supplementary material
Source: PubMed Central journal article supplement (PMC4519388)
Supplement: NIHMS685992-supplement-2.pdf [file NIHMS685992-supplement-2.pdf]

## SUPPLEMENTAL EXPERIMENTAL PROCEDURES

### Transgenes

The following transgenes were obtained from other labs:

*wgls73[ceh-14::TY1::EGFP::3xFLAG]* (Sarov et al., 2012)

*wgls55[mec-3::TY1::EGFP::3xFLAG]* (Sarov et al., 2012)

*otls92[flp-10::gfp]* (Mehta et al., 2004)

*rtEx251[nlp-15::gfp]* (Nathoo et al., 2001)

*gmls21[nlp-1::gfp]* (Frank et al., 2003)

*zwEx107[inx-7::gfp]* (Altun et al., 2009)

*otEx537[ser-2b::gfp]* (Tsalik et al., 2003)

*kyls174[slt-1::gfp]* (Hao et al., 2001)

*otls14[zig-3::gfp]* (Aurelio et al., 2003)

*jsEx896[hid-1::gfp]* (Mesa et al., 2011)

*xdEx44[cam-1b::gfp]* (Zhang et al., 2013)

*jsEx740[aex-6::gfp]* (Mahoney et al., 2006)

*adls1240[eat-4::gfp]* (Lee et al., 1999)

*uls22[mec-3::gfp]* (gift from M. Chalfie). This construct contains begins 2372 bp upstream of the *mec-3* translational start site and is fused to GFP at the end of exon 3.

*uls3[mec-7::gfp]* (gift from M. Chalfie)

*zdls5[mec-4::gfp]* (Clark and Chiu, 2003)

*arEx1127[glt-3::mCherry]* (a gift from D. Shaye)

*qls74[pop-1::gfp]*

*qls95[sys-1::venus]* (Phillips et al., 2007).

*uls115[mec-17::rfp]* (gift from M. Chalfie)

The following transgenes were generated in this study:

Reporter for transcription factors:

*otEx181[ceh-14<sup>prom</sup>::gfp; rol-6]*

*otls337[unc-86<sup>fosmid</sup>::SL2::NLS::YFP::H2B; ttx-3::mCherry]*  
*otEx5851 [unc-86<sup>fosmid</sup>::NLS::mChOpti; lin-44::yfp]*  
*otls429[pag-3<sup>fosmid</sup>::mChOpti; ttx-3::gfp]*

Terminal identity markers:

*otls544[cho-1<sup>fosmid</sup>::mChOpti]*  
*otls439[lad-2<sup>prom</sup>::gfp; pha-1(+)]*  
*otls358[ser-2b::gfp; pha-1] (integration of otEx537)*  
*otEx5480[ahr-1::TY1::EGFP::3xFLAG; ttx-3::mCherry]*

Ectopic expression:

*otEx5440, otEx5441, otEx5442 [unc-86::mec-3; ttx-3::gfp]*  
*otEx5853 [hsp::unc-86; ttx-3::mCherry]*  
*otEx5852[hsp::mec-3; ttx-3::dsRed]*

*ser-2* and *ceh-14* cis-regulatory analysis:

*otEx5779, otEx5780, otEx5781[ser-2<sup>4.7kb prom</sup>::gfp; pha-1(+)]*  
*otEx5782, otEx5783, otEx5784[ser-2<sup>2.4kb prom</sup>::gfp; pha-1(+)]*  
*otEx5785, otEx5786, otEx5787[ser-2<sup>1.3kb prom</sup>::gfp; pha-1(+)]*  
*otEx5788, otEx5789, otEx5790[ser-2<sup>700bp prom</sup>::gfp; pha-1(+)]*  
*otEx5791, otEx5792, otEx5793[ser-2<sup>370bp prom</sup>::gfp; pha-1(+)]*  
*otEx5795, otEx5796, otEx5797[ser-2<sup>370bpmutA prom</sup>::gfp; pha-1(+)]*  
*otEx5798, otEx5799, otEx5800[ser-2<sup>370bpmutB prom</sup>::gfp; pha-1(+)]*  
*otEx5801, otEx5802, otEx5803[ser-2<sup>370bpmutA/B prom</sup>::gfp; pha-1(+)]*  
*otEx5804, otEx5805, otEx5806[ser-2<sup>370bpmutC prom</sup>::gfp; pha-1(+)]*  
*otEx5807, otEx5808, otEx5809[ser-2<sup>370bpmutD prom</sup>::gfp; pha-1(+)]*  
*otEx5810, otEx5811, otEx5812[ceh-14<sup>1kb prom</sup>::gfp; pha-1(+)]*  
*otEx5813, otEx5814, otEx5815[ceh-14<sup>480bp prom</sup>::gfp; pha-1(+)]*  
*otEx5816, otEx5817, otEx5818[ceh-14<sup>480bpmutA prom</sup>::gfp; pha-1(+)]*  
*otEx5819, otEx5820, otEx5821[ceh-14<sup>480bpmutB prom</sup>::gfp; pha-1(+)]*  
*otEx5822, otEx5823, otEx5824[ceh-14<sup>480bpmutC prom</sup>::gfp; pha-1(+)]*

*otEx5825, otEx5826, otEx5827[ceh-14<sup>480bpmutA/B/C prom</sup>::gfp; pha-1(+)]*  
*otEx5828, otEx5829, otEx5830[ceh-14<sup>480bpmutD prom</sup>::gfp; pha-1(+)]*  
*otEx5831, otEx5832, otEx5833[ceh-14<sup>480bpmutE prom</sup>::gfp; pha-1(+)]*  
*otEx5834, otEx5835, otEx5836[ceh-14<sup>480bpmutF prom</sup>::gfp; pha-1(+)]*  
*otEx5837, otEx5838, [ceh-14<sup>480bpmutD/E/F prom</sup>::gfp; pha-1(+)]*  
*otEx5839, otEx5840, otEx5841[ceh-14<sup>480bpmutA/D/E/F prom</sup>::gfp; pha-1(+)]*  
*otEx5842, otEx5843, otEx5844[ceh-14<sup>480bpmutB/D/E/F prom</sup>::gfp; pha-1(+)]*  
*otEx5845, otEx5846, otEx5847[ceh-14<sup>329bp prom</sup>::gfp; pha-1(+)]*  
*otEx5848, otEx5849, otEx5850[ceh-14<sup>170bp prom</sup>::gfp; pha-1(+)]*

## EMSA probe sequences

EMSA probe sequences are as follows (underlining indicates the sequence added for complementarity to the short labeled oligonucleotide):

*ceh-14* promoter probe:

5'-

AATTGTTTTCAATTTAAAATGAGCAACTGTAATTTTCTATTCATTAAAGTATTTTTTTTA  
 CCATTTAAAAGGAACCCATTCATGAAAAGTTGGTCAAGGTCGTTTCC-3'

*tph-1* promoter probe:

5'-

CCCAACACCACATTATTCATGTATTTCTCCAAACCACTGAACCATCTCATTCTCAA  
 ACCAGTTTCTATCCGTTTGTTTGCATTCAATTAATTTTTGGTCAAGGTCGTTTCC-3'

unlabeled *mec-3* promoter probe:

5'-

ACATTTGAAAAACAACAAATTCATTCGAAATGCATTGCCATAATGAATCGACCGA  
 AAAACACAAGTGACCGTCAGGAGATCGATAGAG-3'

*ceh-14* mutated promoter probe:

5'-

AATTGTTTTTCATTTAAAATGAGCAACTGCCATTTTCTATTCCCTAAAGTATTTTTTTTA  
CCATTTAAAAGGAACCCATTCCCGAAAAGTT-3'

unlabeled competitor *ceh-14* promoter probes:

Site D: 5' - TTCTATTCATTAAAGTATT - 3'

Site D (mut): 5' - TTCTATTCCCCCAAGTATT - 3'

Site E: 5' - CCCTCTCTTAATTGCTTTT - 3'

Site E(mut): 5' - CCCTCTCTCCCCTGCTTTT - 3'

Site F: 5' - TGACATCAATTAAGTTGAA - 3'

Site F (mut): 5' - TGACATCACCCCAGTTGAA - 3'

### **Single Molecule FISH**

Oligonucleotides for smFISH consisted of 48 20-nucleotide probes against *pag-3* mRNA coupled to CAL Fluor 610 Red Dye (Biosearch Technologies). smFISH was performed as described at [biosearchtech.com/stellarisprotocols](http://biosearchtech.com/stellarisprotocols). Briefly, L4 stage animals were fixed in 3.7% formaldehyde and hybridized to oligonucleotides at a 1:2000 concentration. *pag-3* mRNAs were quantified by taking stacks of images 0.3 um apart and counting individual fluorescent dots.

## SUPPLEMENTAL REFERENCES

- Altun, Z.F., Chen, B., Wang, Z.W., and Hall, D.H. (2009). High resolution map of *Caenorhabditis elegans* gap junction proteins. *Dev Dyn* 238, 1936-1950.
- Aurelio, O., Boulin, T., and Hobert, O. (2003). Identification of spatial and temporal cues that regulate postembryonic expression of axon maintenance factors in the *C. elegans* ventral nerve cord. *Development* 130, 599-610.
- Clark, S.G., and Chiu, C. (2003). *C. elegans* ZAG-1, a Zn-finger-homeodomain protein, regulates axonal development and neuronal differentiation. *Development* 130, 3781-3794.
- Frank, C.A., Baum, P.D., and Garriga, G. (2003). HLH-14 is a *C. elegans* achaete-scute protein that promotes neurogenesis through asymmetric cell division. *Development* 130, 6507-6518.
- Hao, J.C., Yu, T.W., Fujisawa, K., Culotti, J.G., Gengyo-Ando, K., Mitani, S., Moulder, G., Barstead, R., Tessier-Lavigne, M., and Bargmann, C.I. (2001). *C. elegans* Slit Acts in Midline, Dorsal-Ventral, and Anterior-Posterior Guidance via the SAX-3/Robo Receptor. *Neuron* 32, 25-38.
- Lee, R.Y., Sawin, E.R., Chalfie, M., Horvitz, H.R., and Avery, L. (1999). EAT-4, a homolog of a mammalian sodium-dependent inorganic phosphate cotransporter, is necessary for glutamatergic neurotransmission in *Caenorhabditis elegans*. *J Neurosci* 19, 159-167.
- Mahoney, T.R., Liu, Q., Itoh, T., Luo, S., Hadwiger, G., Vincent, R., Wang, Z.W., Fukuda, M., and Nonet, M.L. (2006). Regulation of synaptic transmission by RAB-3 and RAB-27 in *Caenorhabditis elegans*. *Mol Biol Cell* 17, 2617-2625.
- Mehta, N., Loria, P.M., and Hobert, O. (2004). A genetic screen for neurite outgrowth mutants in *Caenorhabditis elegans* reveals a new function for the F-box ubiquitin ligase component LIN-23. *Genetics* 166, 1253-1267.
- Mesa, R., Luo, S., Hoover, C.M., Miller, K., Minniti, A., Inestrosa, N., and Nonet, M.L. (2011). HID-1, a new component of the peptidergic signaling pathway. *Genetics* 187, 467-483.
- Nathoo, A.N., Moeller, R.A., Westlund, B.A., and Hart, A.C. (2001). Identification of neuropeptide-like protein gene families in *Caenorhabditis elegans* and other species. *Proc Natl Acad Sci U S A* 98, 14000-14005.
- Phillips, B.T., Kidd, A.R., 3rd, King, R., Hardin, J., and Kimble, J. (2007). Reciprocal asymmetry of SYS-1/beta-catenin and POP-1/TCF controls asymmetric divisions in *Caenorhabditis elegans*. *Proc Natl Acad Sci U S A* 104, 3231-3236.
- Sarov, M., Murray, J.I., Schanze, K., Pozniakovski, A., Niu, W., Angermann, K., Hasse, S., Rupprecht, M., Vinis, E., Tinney, M., *et al.* (2012). A genome-scale resource for in vivo tag-based protein function exploration in *C. elegans*. *Cell* 150, 855-866.

Tsalik, E.L., Niacaris, T., Wenick, A.S., Pau, K., Avery, L., and Hobert, O. (2003). LIM homeobox gene-dependent expression of biogenic amine receptors in restricted regions of the *C. elegans* nervous system. *Dev Biol* 263, 81-102.

Zhang, J., Li, X., Jevince, A.R., Guan, L., Wang, J., Hall, D.H., Huang, X., and Ding, M. (2013). Neuronal target identification requires AHA-1-mediated fine-tuning of Wnt signaling in *C. elegans*. *PLoS Genet* 9, e1003618.

## SUPPLEMENTAL FIGURE LEGENDS

### Fig.S1 – Related to Fig.1

**A: BDU-mediated mechanosensory responses are mediated by BDU expressed neuropeptides.** Gravid adults were touched with a platinum pick in the anterior half of the midbody. The number of head swings of backwards movement before animals stopped, reversed direction, or did an omega turn was scored. *n* is given at the bottom of each bar. NS, not significant \*\**p*<.001 \*\*\**p*<.0001 (t-test with Bonferroni correction). Error bars: s.e.m.

A1: Mechanosensory response of wildtype (WT), neuropeptide mutants, and neuropeptide processing mutants.

A2: Rescue of the *nlp-1(ok1469)* phenotype by expressing *nlp-1* under control of two different BDU promoters.

A3: To ensure that *ceh-14(ch3)* and *nlp-1(ok1469)* mutants are not generally defective in backwards response, animals were exposed to the noxious chemical copper chloride. No difference was seen between wild type and *ceh-14* or *nlp-1* animals.

### **B: Crossregulation of transcription factors in ALM and BDU.**

B1: Expression of fosmid-based reporters of transcription factors in embryo and adult. *unc-86<sup>fosmid</sup>::yfp (otIs337)* is expressed in ALM and BDU. *ceh-14<sup>fosmid</sup>::gfp (wglIs73)* is expressed in BDU. *mec-3 (wglIs55)* is expressed exclusively expressed in ALM. *pag-3<sup>fosmid</sup>::rfp (otIs429)* is expressed in ALM and BDU. Arrows in embryo images indicate ALM, arrowheads indicate BDU.

B2: Expression levels of *pag-3* in BDU and ALM are similar, as determined by mRNA counting with smFISH. smFISH was performed on L4 stage animals and expression of *pag-3* was compared between ALM and BDU neurons. Each data point represents the number of mRNAs seen in either ALM or BDU of a single animal. See Supplementary Experimental procedures for more details on smFISH.

B3: Cross-regulation of BDU transcription factors. While expression of *unc-86* is unaffected by either *pag-3(Is20)* or *ceh-14(ch3)*, expression of *pag-3* is off in BDU in *unc-86(n846)* and expression of *ceh-14* is off in both *unc-86(n846)* and *pag-3(Is20)*. Animals were scored at the L4 stage. *n*≥50.

B4: Summary of transcription factor interactions. Regulation of *ceh-14* by both *pag-3* and *unc-86* (“feedforward loop”) is inferred from the analysis of the *cis*-regulatory architecture of the *ceh-14* locus described in Fig.3B. *mec-3* regulation by *unc-86* was previously shown (Xue et al. 1992).

### Fig.S2 – Related to Fig.2

**A: UNC-86 binds to a probe derived from the *ceh-14* promoter.** This binding is competed away with addition of cold oligos corresponding to putative UNC-86 binding sites (see main text), but not by mutated forms of those binding sites. EMSA was performed with 100 nM UNC-86. See Supplementary Experimental Procedures for probe sequences.

**B: Specificity of UNC-86 binding to *ceh-14* promoter.** UNC-86 binding is competed away with the addition of cold oligos identical to the probe but not by a mutated form of the oligo missing the UNC-86 binding site. See Supplementary Experimental Procedures for probe sequences.

**Fig.S3 – Related to Fig.5**

**A: The *unc-86p::mec-3* transgene rescues the mutant phenotypes of *mec-3*.** *mec-17::rfp*, an ALM reporter, was examined for expression in ALM in wild type, *mec-3(e1338)*, and the *mec-3* mutant rescued by *mec-3* driven by the *unc-86* 5.2kb promoter

**B: The *unc-86p::pag-3* transgenes rescues the mutant phenotypes of *pag-3*.** *flp-10::gfp*, a BDU reporter, was examined for expression in BDU in wild type, *pag-3(ls20)*, and the *pag-3* mutant rescued by *pag-3* driven by the *unc-86* 5.2kb promoter.

**Fig.S4 – Related to Fig.6**

**A: Competition for UNC-86 binding is dependent on the presence of an unlabeled competitor probe.** EMSA was performed with or without the presence of an unlabeled *mec-3* promoter probe using 100 nM UNC-86 and 200 nM MEC-3.

**B: MEC-3, but not PAG-3, is able to compete UNC-86 away from binding to a *ceh-14* promoter.** EMSA was performed with 100 nM UNC-86, 100 or 200 nM MEC-3, and 100 or 200 nM PAG-3.

**C: Loss of UNC-86/MEC-3 binding abolishes the competition mechanism.** UNC-86(L195F) binding to a *ceh-14* probe is unaffected by the addition of MEC-3. EMSA was performed with 100 nM UNC-86(L195F) and 100 or 200 nM MEC-3.



**A**

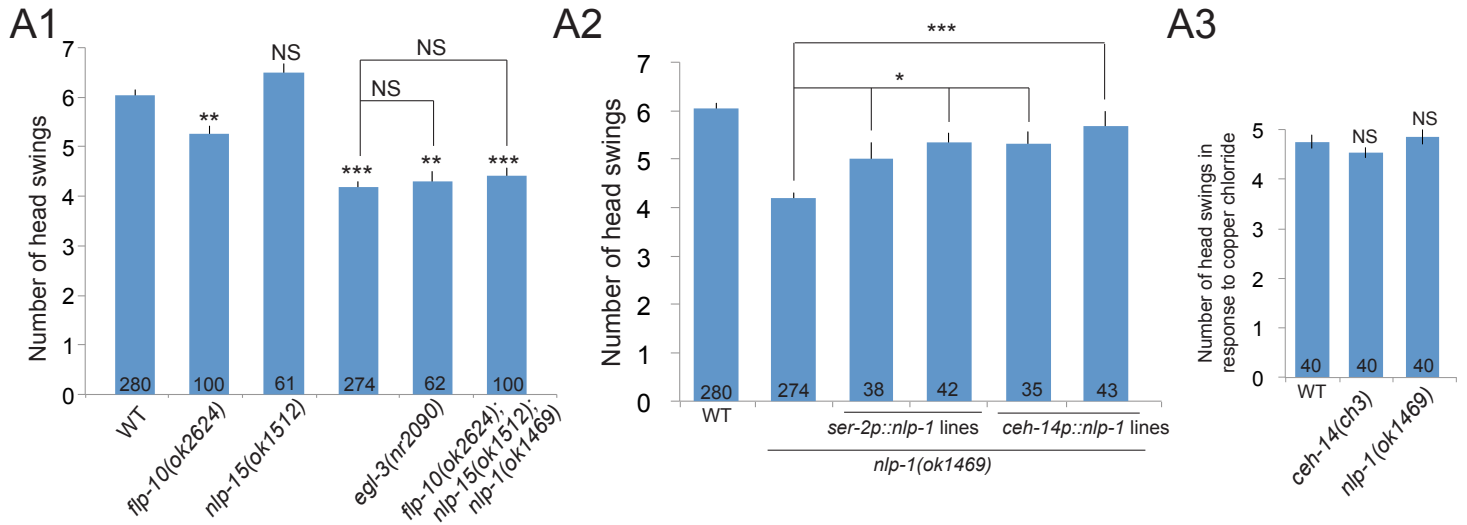

**B**

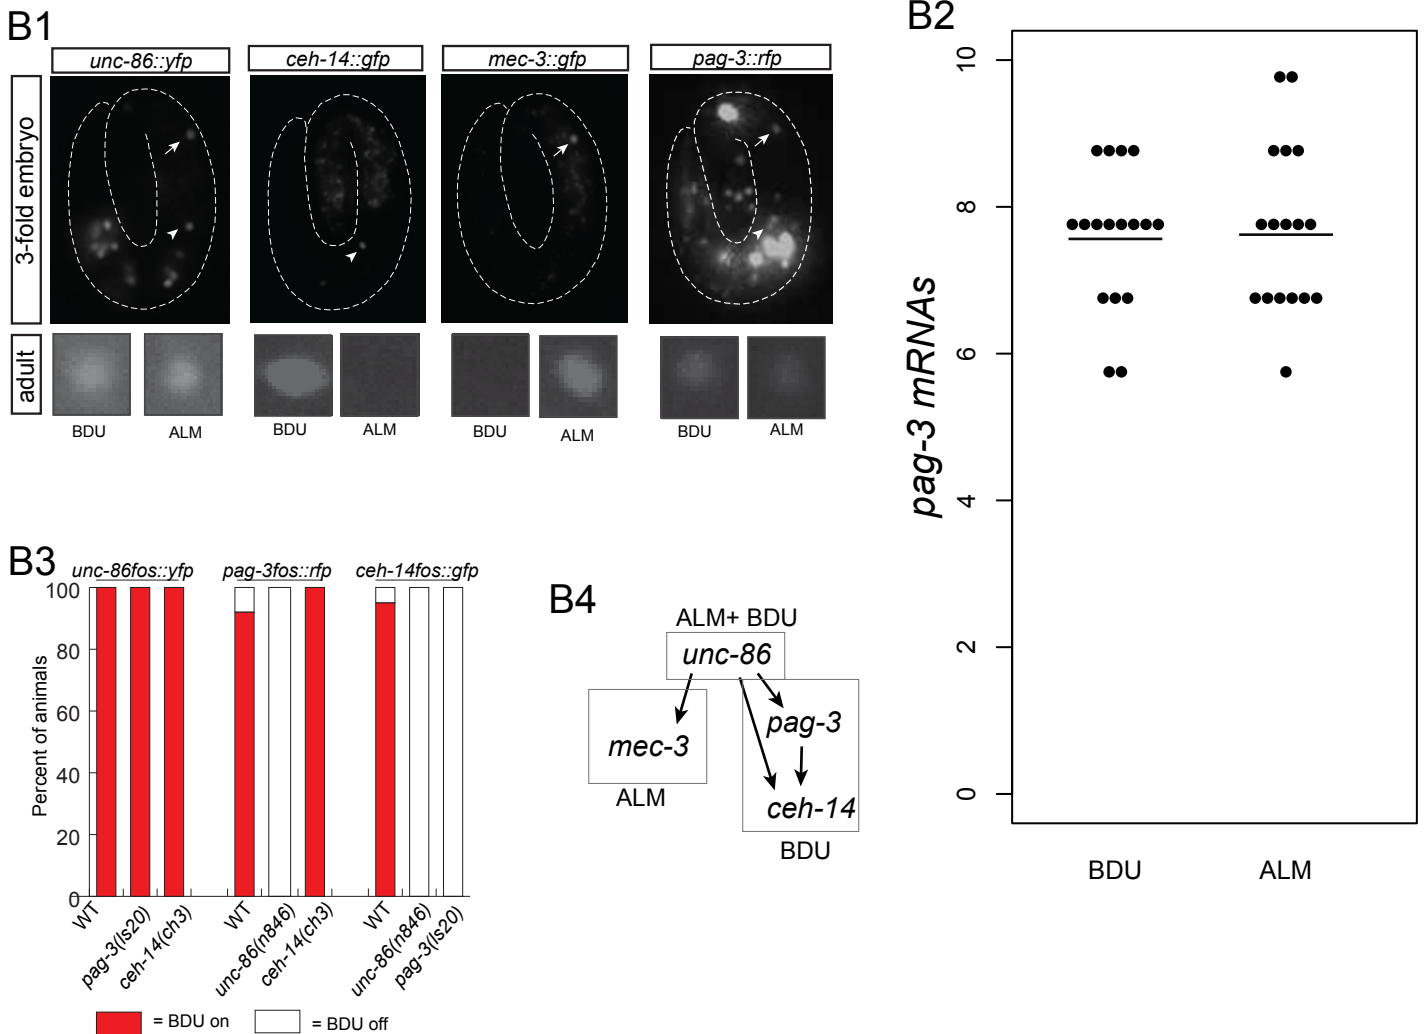

**A**

UNC-86: - + + + + + + + + + + + + + +  
Cold competitor: - - Site D Site D (mut) Site E Site E (mut) Site F Site F (mut)

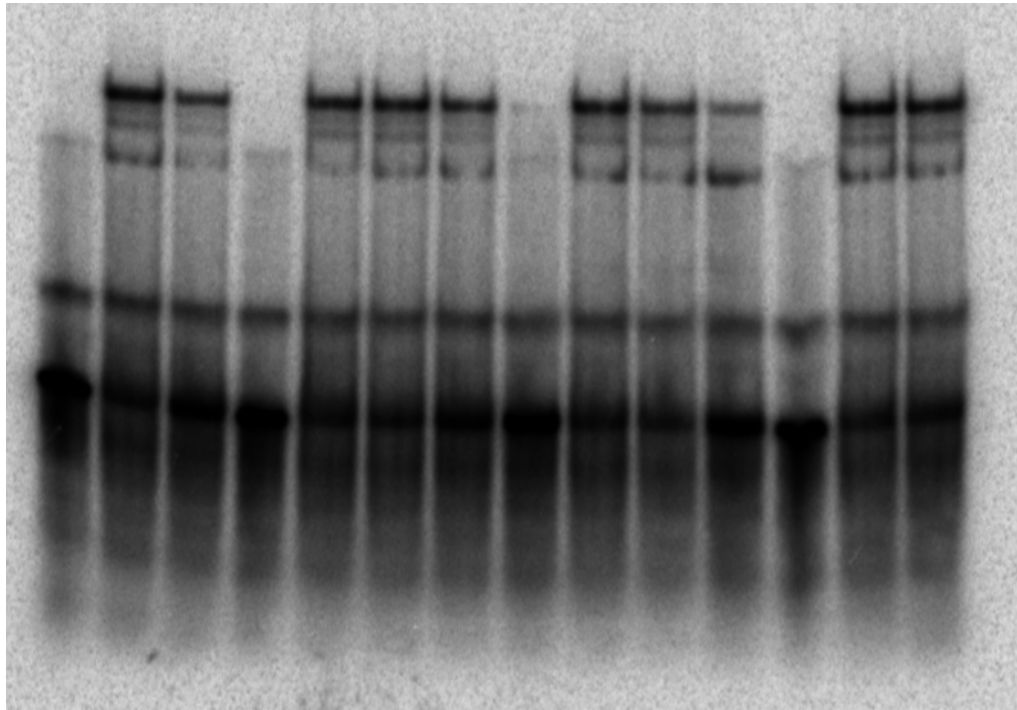**B**

Cold competitor: - - *ceh-14* probe mutated *ceh-14* probe  
UNC-86: - + + + + +

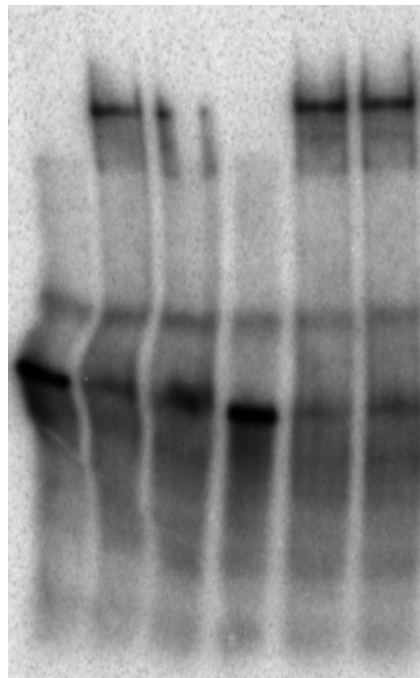

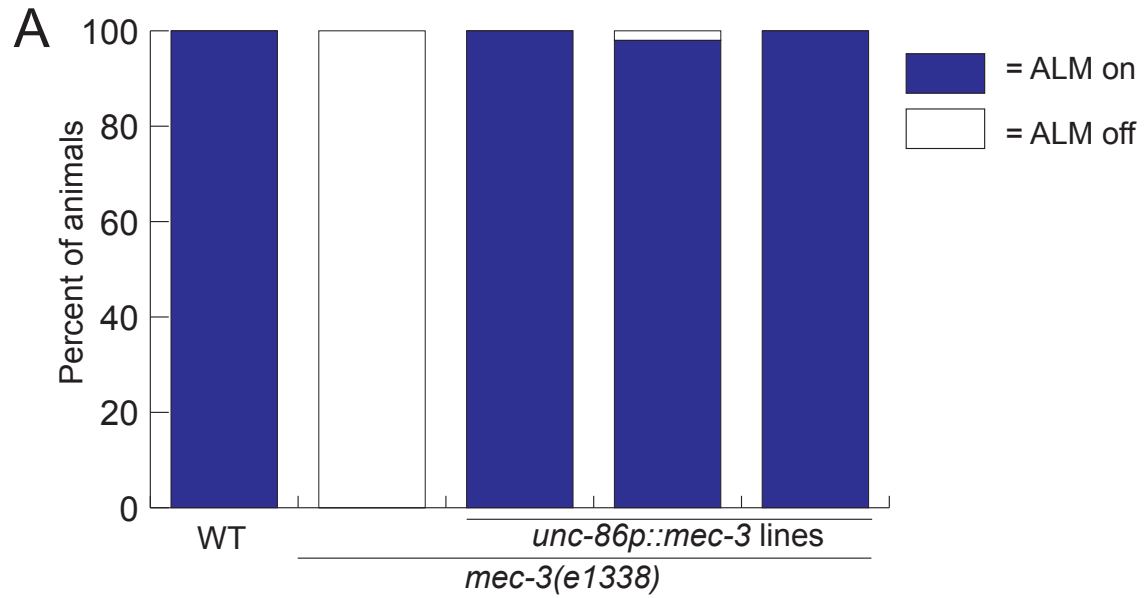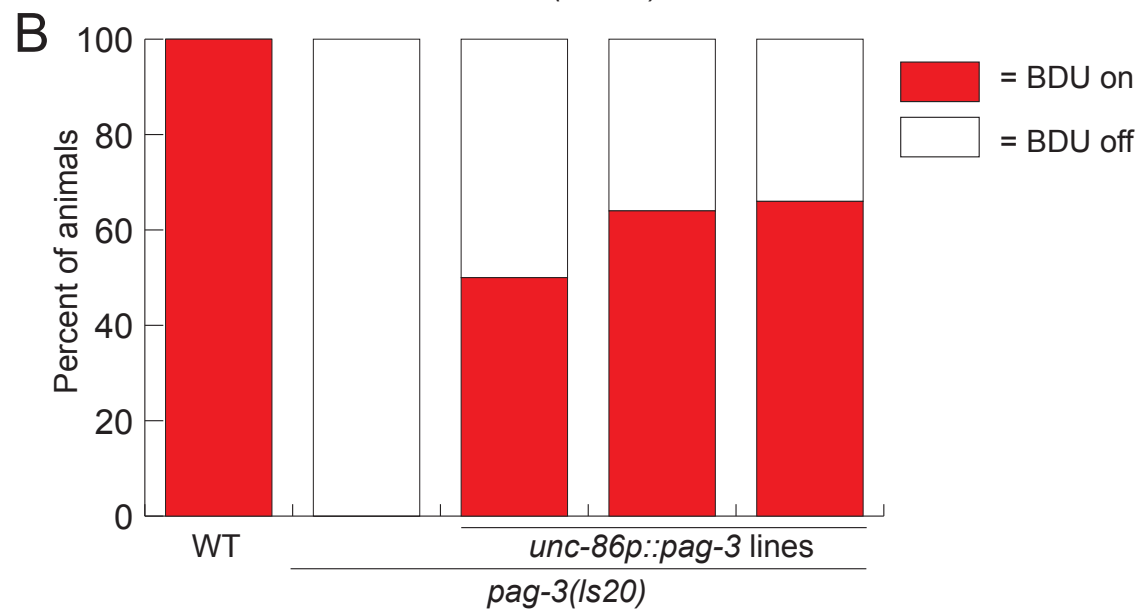

Supplemental Figure S3

# A

UNC-86: - + + + +

MEC-3: - - + - +

Unlabeled ALM probe: + + + - -

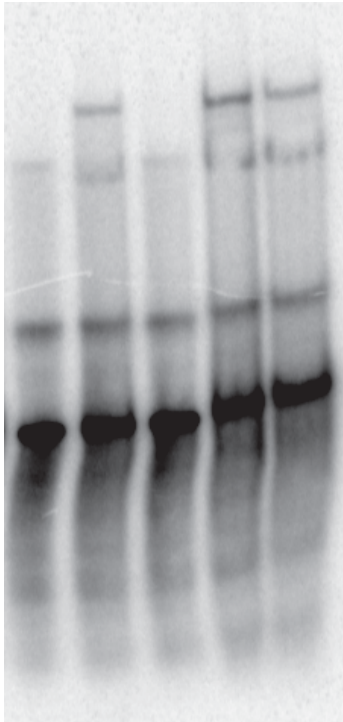

probe:

*ceh-14*

# B

UNC-86: - + + + + +

MEC-3: - -  - -

PAG-3: - - - - 

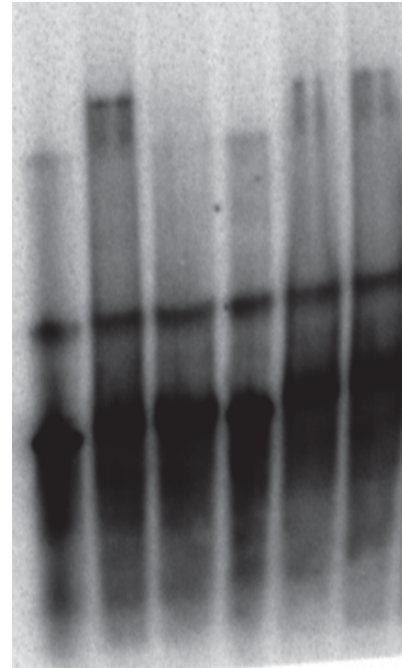

probe:

*ceh-14*

# C

MEC-3: - - 

UNC-86(L195F): - + + +

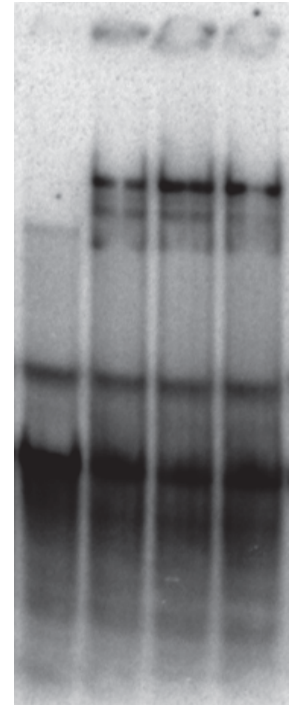

probe:

*ceh-14*
